# Supplementary material for: Genetic pleiotropy between multiple sclerosis and schizophrenia but not bipolar disorder: differential involvement of immune-related gene loci
Source: PubMed Central journal article supplement — Mol Psychiatry. 2014 Jan 28;20(2):207–14. doi: 10.1038/mp.2013.195 (PMC4356743; doi:10.1038/mp.2013.195), 2014-01-28
Supplement: mp2013195x1.pdf [file mp2013195x1.pdf]

**Supplementary Figure 1**

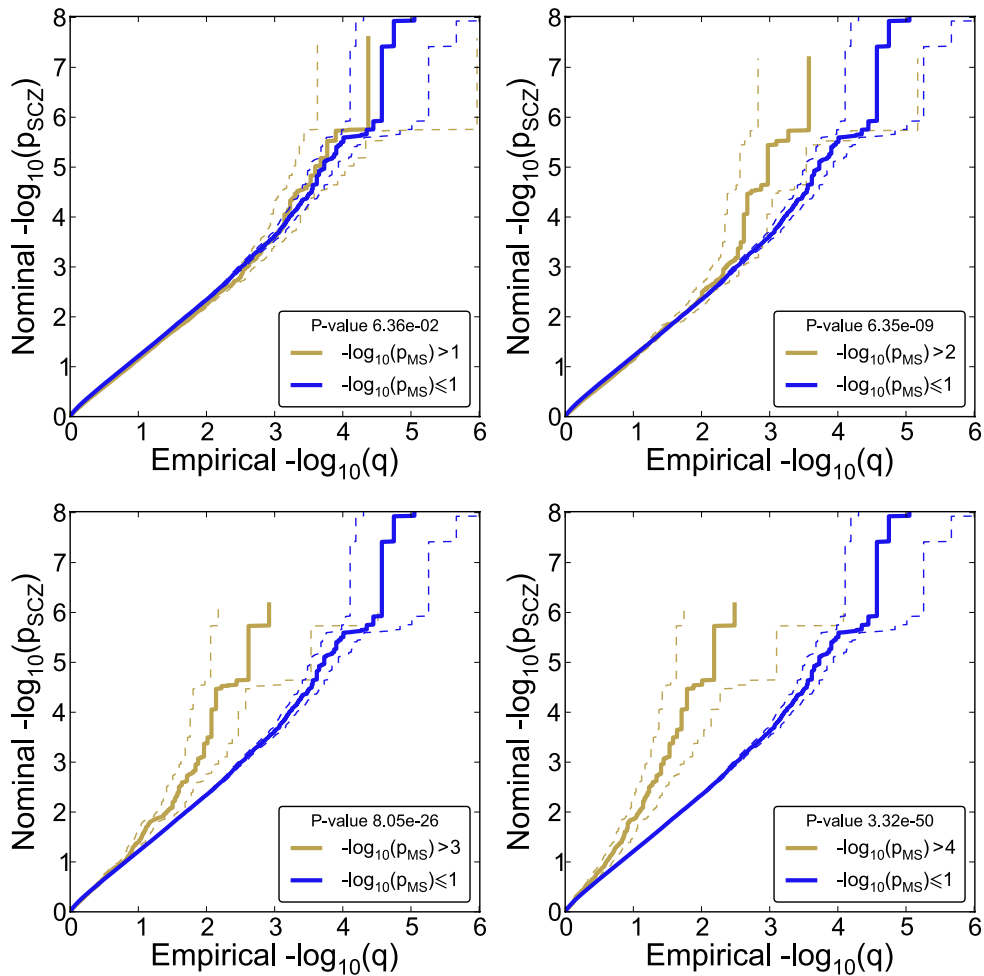

Conditional Q-Q plot with 95% confidence interval of expected versus observed  $-\log_{10}(p)$ -values in schizophrenia (SCZ) as a function of significance of association with multiple sclerosis (MS) at the level of:  $-\log_{10}(p) \geq 1$ ,  $-\log_{10}(p) \geq 2$ ,  $-\log_{10}(p) \geq 3$  and  $-\log_{10}(p) \geq 4$  (red lines) compared with  $-\log_{10}(p) \geq 0$  (blue line). All results were corrected for genomic inflation and linkage disequilibrium (SNPs with  $r^2 > 0.2$  were removed). As illustrated by the non-overlapping confidence interval regions, there was significant enrichment in SCZ given MS association. Two sample Student's t-test p-value between each stratum and  $-\log_{10}(p) \leq 1$  are shown in the legends.
