# Supplementary material for: Genetic pleiotropy between multiple sclerosis and schizophrenia but not bipolar disorder: differential involvement of immune-related gene loci
Source: PubMed Central journal article supplement — Mol Psychiatry. 2014 Jan 28;20(2):207–14. doi: 10.1038/mp.2013.195 (PMC4356743; doi:10.1038/mp.2013.195), 2014-01-28
Supplement: mp2013195x3.pdf [file mp2013195x3.pdf]

### Supplementary Figure 3

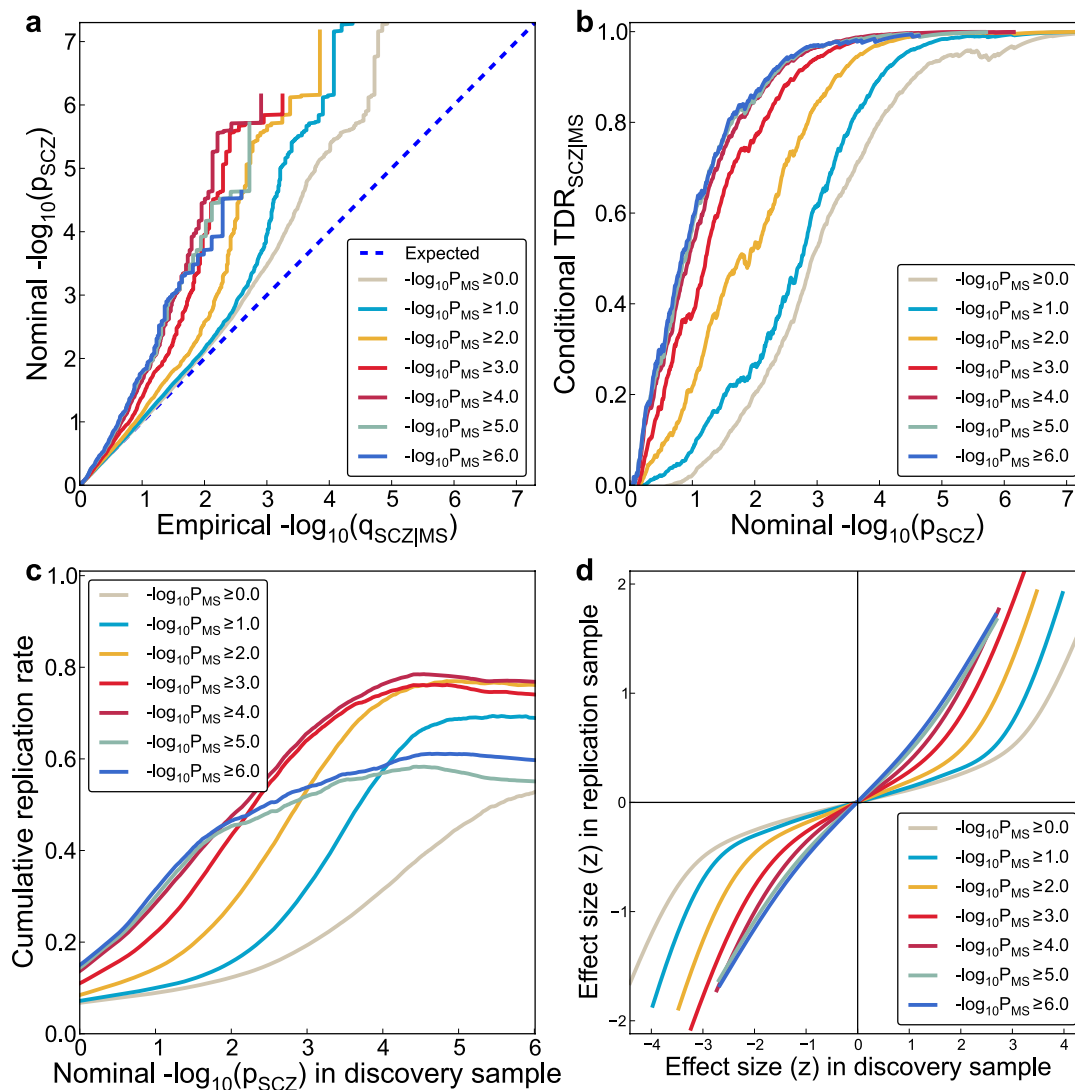

**a.)** Conditional Q-Q plot of nominal versus empirical  $-\log_{10}$  p-values (corrected for inflation) in schizophrenia (SCZ) below the standard GWAS threshold of  $p < 5 \times 10^{-8}$  as a function of significance of association with multiple sclerosis (MS) at the level of  $-\log_{10}(p) \geq 0, -\log_{10}(p) \geq 1, -\log_{10}(p) \geq 2, -\log_{10}(p) \geq 3, -\log_{10}(p) \geq 4, -\log_{10}(p) \geq 5$  and  $-\log_{10}(p) \geq 6$  corresponding to  $p \leq 1, p \leq 0.1, p \leq 0.01, p \leq 0.001, p \leq 0.0001, p \leq 0.00001, p \leq 0.000001$ , respectively. Dotted lines indicate the null-hypothesis. **b.)** Conditional True Discovery Rate (TDR) plots illustrating the increase in TDR associated with increased pleiotropic enrichment in SCZ conditioned on MS (SCZ|MS). **c.)** Cumulative replication plot showing the average rate of replication ( $p < 0.05$ ) within SCZ sub-studies for a given p-value threshold shows that pleiotropic enriched SNP categories replicate at a higher rate in independent SCZ samples, for SCZ conditioned on MS (SCZ|MS). The vertical intercept is the overall replication rate per category. **d.)** Z-score-z-score plot demonstrates that the empirical replication z-scores closely match the expected a posteriori effect sizes of schizophrenia (SCZ) and are strongly dependent upon pleiotropy with multiple sclerosis (MS). Analysis is based on split half method of the 17 PGC SCZ sub-studies.
