# Supplementary material for: Genetic pleiotropy between multiple sclerosis and schizophrenia but not bipolar disorder: differential involvement of immune-related gene loci
Source: PubMed Central journal article supplement — Mol Psychiatry. 2014 Jan 28;20(2):207–14. doi: 10.1038/mp.2013.195 (PMC4356743; doi:10.1038/mp.2013.195), 2014-01-28
Supplement: mp2013195x5.pdf [file mp2013195x5.pdf]

## Supplementary Figure 5

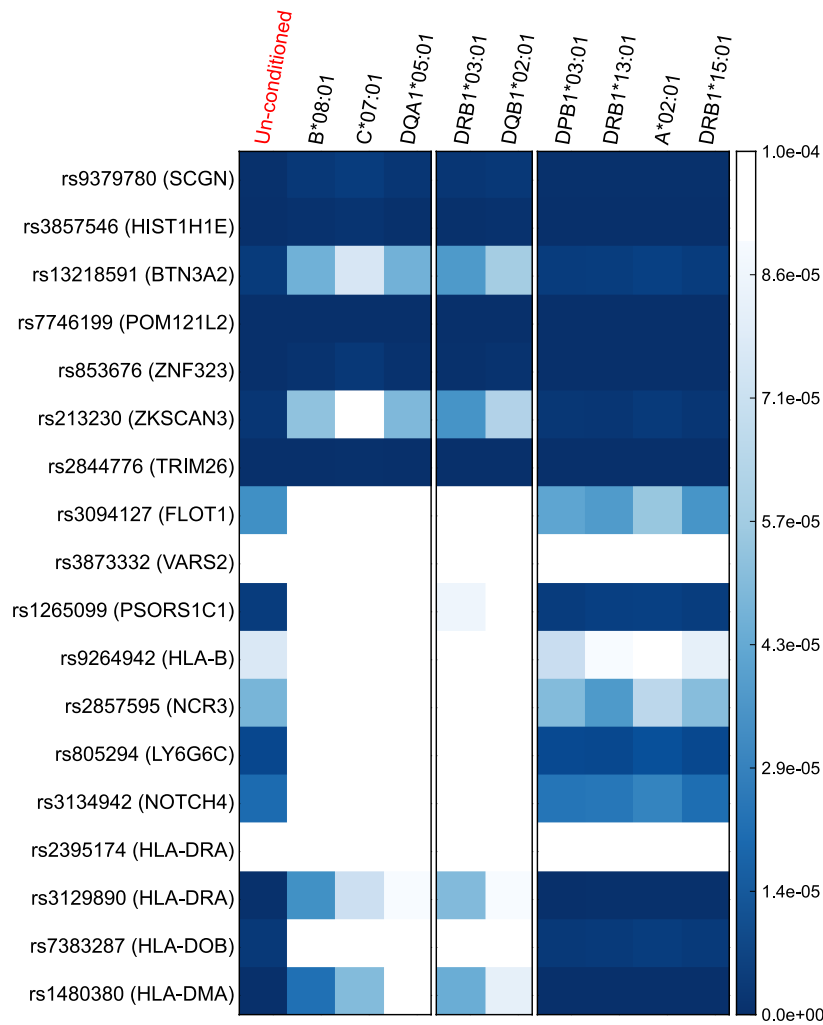

The association of the SNPs (y axis) with SCZ was investigated by logistic regression with study indicator variables and the first 5 principal components as covariate, without conditioning (Un-conditioned) and conditioning on each HLA allele (x axis) separately. The p-values were coded by saturation of colors and p-values larger than  $10^{-4}$  were set to white color. The left panel shows HLA-alleles associated with SCZ (p-value  $< 7.8 \times 10^{-4}$ ), the middle panel shows HLA-allele associated with both SCZ and MS (reported by others) and the right panel shows HLA-allele associated with MS only. The symbols of genes close to each SNP are listed in parenthesis.
