# Supplementary material for: Genetic pleiotropy between multiple sclerosis and schizophrenia but not bipolar disorder: differential involvement of immune-related gene loci
Source: PubMed Central journal article supplement — Mol Psychiatry. 2014 Jan 28;20(2):207–14. doi: 10.1038/mp.2013.195 (PMC4356743; doi:10.1038/mp.2013.195), 2014-01-28
Supplement: mp2013195x6.pdf [file mp2013195x6.pdf]

## Supplementary Figure 6

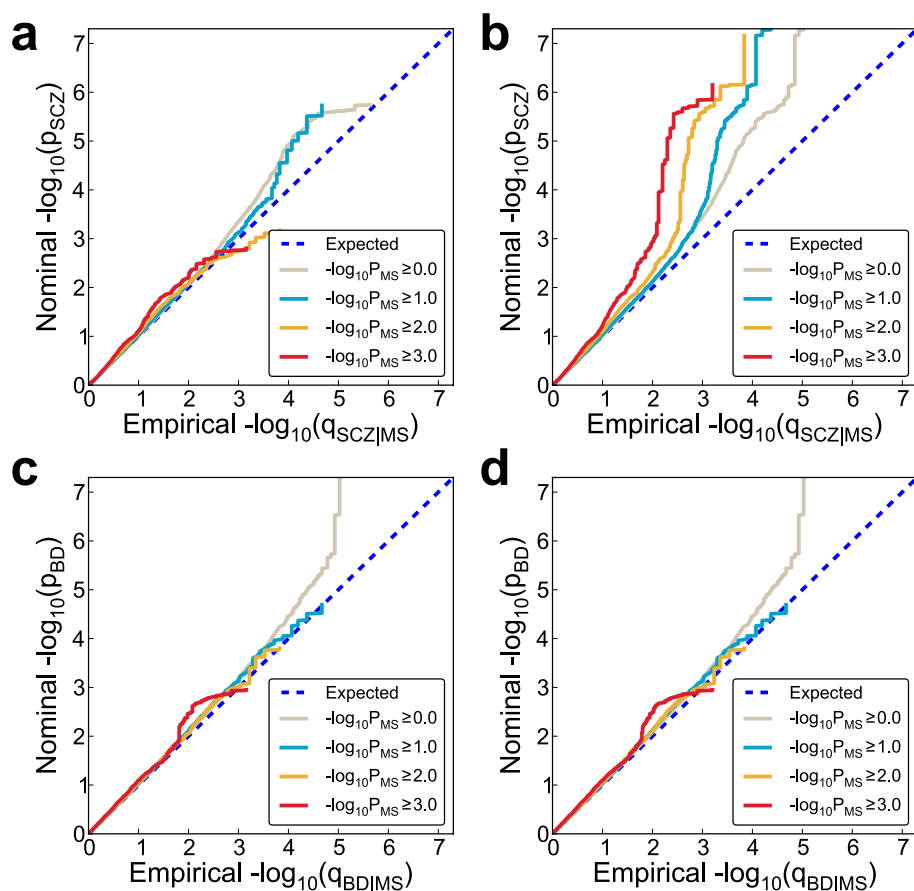

Conditional Q-Q plot of nominal versus empirical  $-\log_{10}$  p-values (corrected for inflation) in Schizophrenia (SCZ) and Bipolar disorder (BD) below the standard GWAS threshold of  $p < 5 \times 10^{-8}$  as a function of significance of association with multiple sclerosis (MS) at the level of  $-\log_{10}(p) \geq 0$ ,  $-\log_{10}(p) \geq 1$ ,  $-\log_{10}(p) \geq 2$ ,  $-\log_{10}(p) \geq 3$  corresponding to  $p \leq 1$ ,  $p \leq 0.1$ ,  $p \leq 0.01$ ,  $p \leq 0.001$ , respectively, after removing **a.**) SCZ SNPs located within the MHC region and other SNPs in LD ( $r^2 > 0.2$ ) with such SNPs, **b.**) SCZ SNPs located within MHC region genes whose alleles are studied in the current study and other SNPs in LD ( $r^2 > 0.2$ ) with such SNPs, **c.**) BD SNPs located within the MHC region and other SNPs in LD ( $r^2 > 0.2$ ) with such SNPs, **d.**) BD SNPs located within MHC region genes whose alleles are studied in the current study and other SNPs in LD ( $r^2 > 0.2$ ) with such SNPs. Dotted lines indicate the null-hypothesis.
