# Supplementary material for: Genetic pleiotropy between multiple sclerosis and schizophrenia but not bipolar disorder: differential involvement of immune-related gene loci
Source: PubMed Central journal article supplement — Mol Psychiatry. 2014 Jan 28;20(2):207–14. doi: 10.1038/mp.2013.195 (PMC4356743; doi:10.1038/mp.2013.195), 2014-01-28
Supplement: mp2013195x8.pdf [file mp2013195x8.pdf]

Supplementary Figure 8

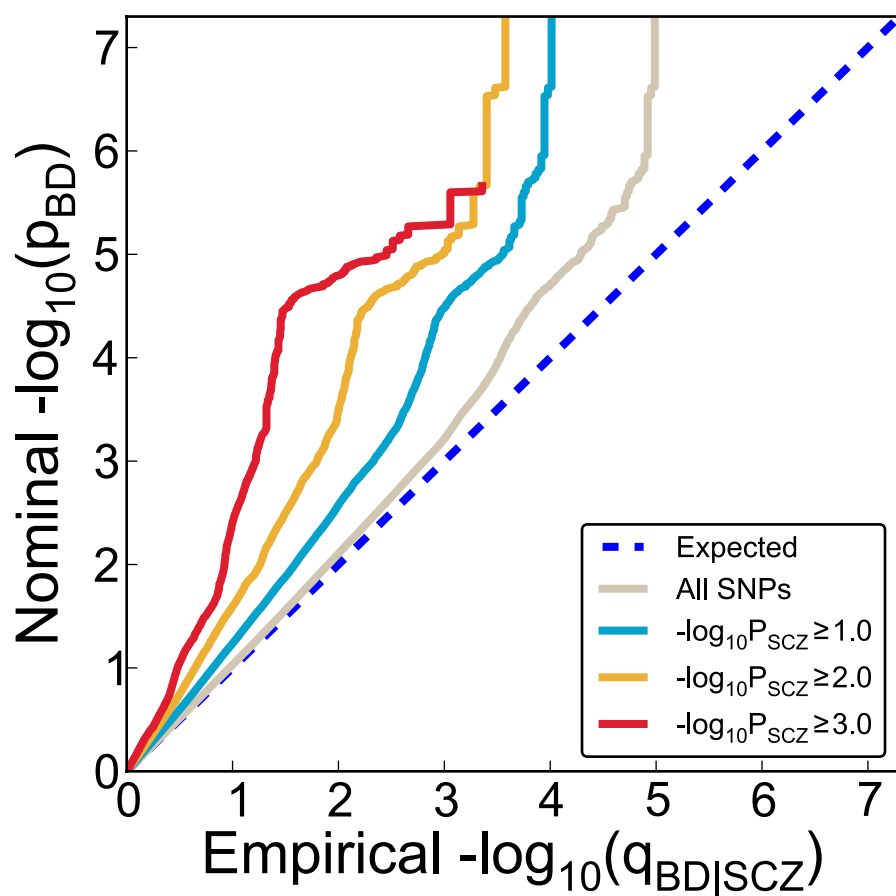

Conditional Q-Q plot of nominal versus empirical  $-\log_{10}$  p-values (corrected for inflation) in Bipolar disorder (BD) below the standard GWAS threshold of  $p < 5 \times 10^{-8}$  as a function of significance of association with schizophrenia (SCZ) at the level of  $-\log_{10}(p) \geq 0$ ,  $-\log_{10}(p) \geq 1$ ,  $-\log_{10}(p) \geq 2$ ,  $-\log_{10}(p) \geq 3$  corresponding to  $p \leq 1$ ,  $p \leq 0.1$ ,  $p \leq 0.01$ ,  $p \leq 0.001$ , respectively. The MHC-related SNPs was removed before analysis. Dotted lines indicate the null-hypothesis.
