# Supplementary material for: Genetic pleiotropy between multiple sclerosis and schizophrenia but not bipolar disorder: differential involvement of immune-related gene loci
Source: PubMed Central journal article supplement — Mol Psychiatry. 2014 Jan 28;20(2):207–14. doi: 10.1038/mp.2013.195 (PMC4356743; doi:10.1038/mp.2013.195), 2014-01-28
Supplement: mp2013195x11.pdf [file mp2013195x11.pdf]

**Supplementary Table 3 Conditional analysis of SCZ-associated HLA alleles.**

| <b>HLA allele</b> | <b>Un-conditioned</b> | <b>B*08:01</b> | <b>C*07:01</b> | <b>DRB1*03:01</b> | <b>DQA1*05:01</b> | <b>DQB1*02:01</b> |
|-------------------|-----------------------|----------------|----------------|-------------------|-------------------|-------------------|
| <b>B*08:01</b>    | 4.7e-4                |                | 0.358 (0.918)  | 0.37 (0.662)      | 0.221(0.573)      | 0.215(0.583)      |
| <b>C*07:01</b>    | 2.1e-4                | 0.51           |                | 0.175(0.696)      | 0.278(0.665)      | 0.283(0.650)      |
| <b>DRB1*03:01</b> | 6.1e-4                | 0.09           | 0.04           |                   | 0.531(0.962)      | 0.487(0.951)      |
| <b>DQA1*05:01</b> | 3.4e-4                | 0.03           | 0.06           | 0.12              |                   | 0.826(0.938)      |
| <b>DQB1*02:01</b> | 7.6e-4                | 0.05           | 0.11           | 0.19              | 0.81              |                   |

Association of HLA alleles with SCZ examined by logistic regression, using sample indicator variables and the first principal components as covariates (Un-conditioned), and including another significant HLA allele as extra covariate. P-values are listed on the lower triangle section. Linkage disequilibrium  $r^2$ -values and D'-value (in parenthesis) are listed on the upper triangular section.
